# Supplementary material for: Computational tools for drawing, building and displaying carbohydrates: a visual guide
Source: PubMed Central journal article supplement (PMC7537382; doi:10.3762/bjoc.16.199), 2020-10-02
Supplement: Beilstein_J_Org_Chem-16-2448-s001.pdf [file Beilstein_J_Org_Chem-16-2448-s001.pdf]

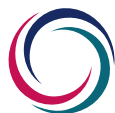

## Supporting Information

for

### **Computational tools for drawing, building and displaying carbohydrates: a visual guide**

Kanhaya Lal, Rafael Bermeo and Serge Perez

*Beilstein J. Org. Chem.* **2020**, *16*, 2448–2468. [doi:10.3762/bjoc.16.199](https://doi.org/10.3762/bjoc.16.199)

### **Features of glycan sketchers, builders and viewers**

**Table S1.** Schematic summary of important features of glycan sketchers, builders and viewers.

| S.No. | Software Tool                      | 2D sketchers and builders |                  |             |                      |                          |                |                  |           |               |                        |         | 3D Builders          |       |               |                      |            |                      |              | 3D (representation) viewers |       |                |         |
|-------|------------------------------------|---------------------------|------------------|-------------|----------------------|--------------------------|----------------|------------------|-----------|---------------|------------------------|---------|----------------------|-------|---------------|----------------------|------------|----------------------|--------------|-----------------------------|-------|----------------|---------|
|       |                                    | Sugar Sketcher            | LiGraph          | Glyco Glyph | Glycan Builder2 SNFG | Sugarbind Glycan Builder | Draw RingS     | Draw Glycan SNFG | Glycano   | Glyco Editor  | Glyco.me Sugar Builder | KegDraw | Polys Glycan Builder | Sweet | CHARMM Gui    | Glycam Carbo Builder | do Glycans | Rosetta Carbohydrate | Carb Builder | 3D-SNFG                     | PyMOL | Sweet UnityMol | LiteMol |
|       |                                    | 1                         | Available online | ✓           | ✓                    | ✓                        |                | ✓                | ✓         | ✓             | ✓                      | ✓       | ✓                    |       | ✓             | ✓                    | ✓          | ✓                    |              |                             |       | ✓              |         |
| 2     | Download for local installation    | ✓                         |                  | ✓           | ✓                    |                          |                | ✓                | ✓         |               |                        | ✓       |                      |       |               | ✓                    | ✓          | ✓                    | ✓            | ✓                           | ✓     | ✓              | ✓       |
| 3     | Instructions                       |                           | ✓                | ✓           | ✓                    | ✓                        | ✓              | ✓                |           |               |                        | ✓       | ✓                    | ✓     | ✓             |                      | ✓          | ✓                    | ✓            | ✓                           | ✓     | ✓              | ✓       |
| 4     | Self-explanatory interface         | ✓                         |                  | ✓           | ✓                    | ✓                        | ✓              | ✓                | ✓         | ✓             | ✓                      | ✓       | ✓                    |       | ✓             | ✓                    |            |                      |              |                             |       | ✓              |         |
| 5     | Image output (file type)           | .SVG                      | .SVG             | .SVG        | .PNG, .SVG           | .PNG .SVG .BMP ...       | .PNG (save as) | .JPG (save as)   | .PNG .SVG | (screen shot) | .PNG .SVG              | .PNG    | .SVG                 |       | (screen shot) | .GIF (save as)       |            |                      |              | .BMP                        | .PNG  | .PNG           | .PNG    |
| 6     | SNFG colours                       | CMYK                      | CMYK             | RGB         | RGB                  |                          | CMYK           | RGB              |           | RGB           | RGB                    |         | CMYK                 |       | CMYK          |                      |            |                      | CMYK         | RGB                         |       | RGB            |         |
| 7     | Oxford linkage geometry            | ✓                         |                  |             | ✓                    | ✓                        | ✓              | ✓                | ✓         |               | ✓                      |         | ✓                    |       |               |                      |            |                      |              |                             |       |                |         |
| 8     | Functionalization                  | ✓                         |                  | ✓           | ✓                    | ✓                        |                | ✓                | ✓         | ✓             |                        | ✓       |                      |       | ✓             | ✓                    | ✓          | ✓                    |              |                             | ✓     |                |         |
| 9     | Repeating units [ ]                | ✓                         |                  |             | ✓                    | ✓                        | ✓              | ✓                | ✓         | ✓             |                        | ✓       | ✓                    |       |               |                      |            |                      |              |                             | ✓     |                |         |
| 10    | Linking as glyco-conjugates        |                           |                  |             | ✓                    |                          | ✓              | ✓                |           |               |                        | ✓       |                      |       |               | ✓                    | ✓          | ✓                    | ✓            | ✓                           | ✓     |                | ✓       |
| 11    | Text input                         | ✓                         | ✓                | ✓           | ✓                    | ✓                        | ✓              | ✓                | ✓         |               |                        |         | ✓                    | ✓     |               | ✓                    | ✓          | ✓                    | ✓            |                             |       |                | ✓       |
| 12    | Option to modify by coding         | ✓                         | ✓                | ✓           |                      |                          | ✓              | ✓                |           |               |                        |         | ✓                    | ✓     |               | ✓                    |            |                      |              | ✓                           | ✓     |                |         |
| 13    | 3D-model visualization             |                           |                  |             |                      |                          |                |                  |           |               |                        |         | ✓                    | ✓     | ✓             | ✓                    |            |                      |              | ✓                           | ✓     |                | ✓       |
| 14    | 3D model output                    |                           |                  |             |                      |                          |                |                  |           |               |                        |         | ✓                    | ✓     | ✓             | ✓                    | ✓          | ✓                    | ✓            | ✓                           | ✓     | ✓              | ✓       |
| 15    | Text/String output (any format)    | ✓                         | ✓                | ✓           | ✓                    | ✓                        | ✓              |                  |           | ✓             |                        | ✓       | ✓                    | ✓     | ✓             | ✓                    |            | ✓                    | ✓            |                             |       |                |         |
| 16    | Glycan library                     | ✓                         |                  | ✓           | ✓                    | ✓                        | ✓              |                  |           | ✓             |                        |         |                      | ✓     |               |                      |            |                      |              |                             | ✓     |                |         |
| 17    | No. of templates (monosaccharides) | 70+                       | 15+              | 80+         | 70+                  | 50+                      | 70+            | 60+              | 60+       | 40+           | 10+                    | 10+     | 100+                 | 40+   | 20+           | 30+                  |            |                      | 40+          |                             |       |                | 40+     |
